# Supplementary material
Source: PubMed Central journal article supplement (PMC5874922)
Supplement: mbo002183805sf1.pdf [file mbo002183805sf1.pdf]

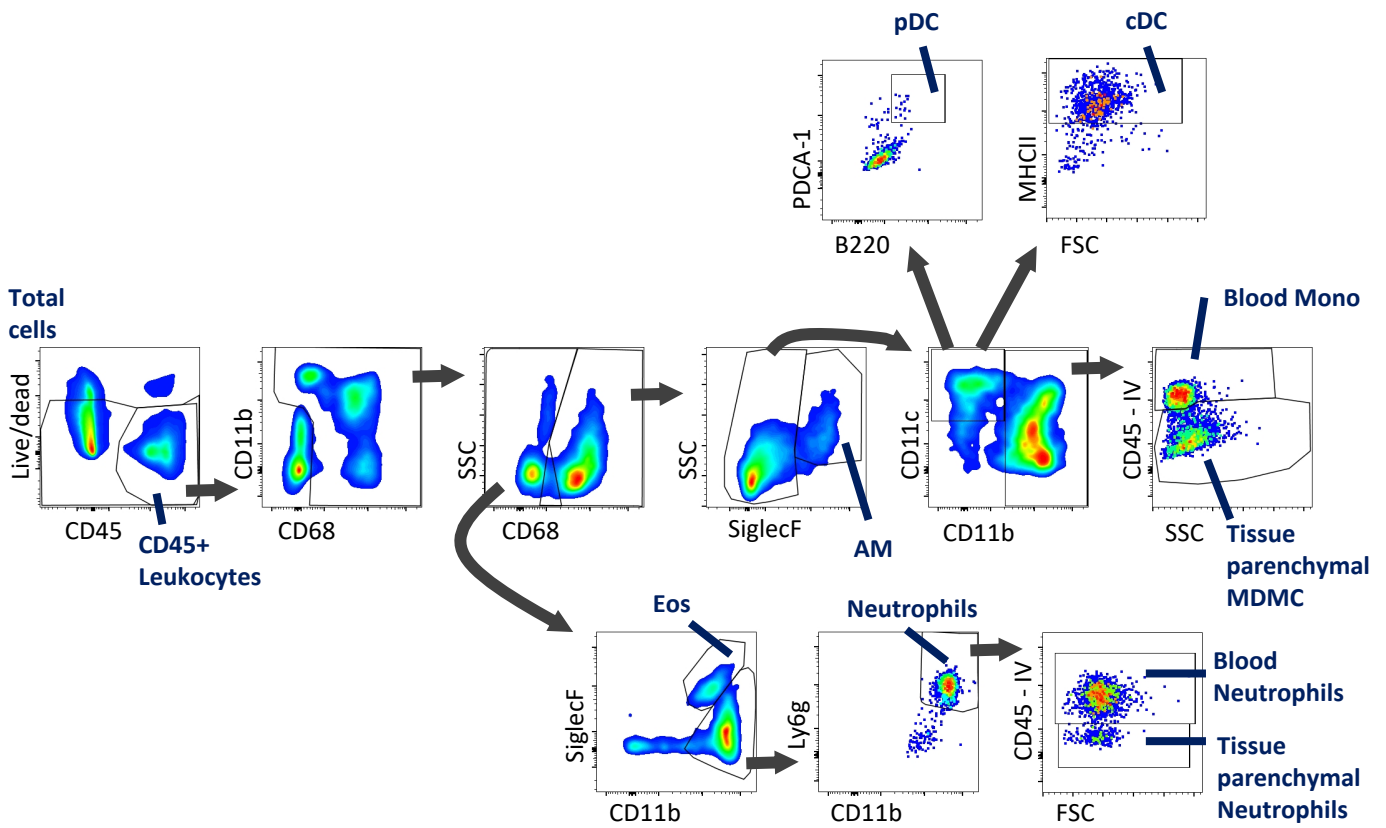

**Supplementary Figure 1.** Demonstration of gating strategy for Immunophenotyping of lung cells for myeloid populations. Pictured are populations in an uninfected CGD mouse. Initial gates eliminating doublets and debris are not shown. Vascular vs. parenchymal gating using intravenously injected antibody staining was performed for all cell types but is only demonstrated for monocytic cells and neutrophils for simplicity.
